# Supplementary material for: Glucose-6-phosphate dehydrogenase maintains redox homeostasis and biosynthesis in LKB1-deficient KRAS-driven lung cancer
Source: PubMed Central journal article supplement (PMC11245543; doi:10.1038/s41467-024-50157-8), 2024-07-12
Supplement: 41467_2024_50157_MOESM1_ESM.pdf [file 41467_2024_50157_MOESM1_ESM.pdf]

## Supplementary information for

### Glucose-6-Phosphate Dehydrogenase Maintains Redox Homeostasis and Biosynthesis in *LKB1*-Deficient *KRAS*-Driven Lung Cancer

Taijin Lan<sup>1</sup>, Sara Arastu<sup>1</sup>, Jarrick Lam<sup>1</sup>, Hyungsin Kim<sup>1</sup>, Wenping Wang<sup>1</sup>, Samuel Wang<sup>1</sup>, Vrushank Bhatt<sup>1</sup>, Eduardo Cararo Lopes<sup>1,2</sup>, Zhixian Hu<sup>1</sup>, Michael Sun<sup>1</sup>, Xuefei Luo<sup>1</sup>, Jonathan M. Ghergurovich<sup>3</sup>, Xiaoyang Su<sup>1,4</sup>, Joshua D. Rabinowitz<sup>1,5,6,7</sup>, Eileen White<sup>1,2,6</sup>, Jessie Yanxiang Guo<sup>1,4,8,\*</sup>

<sup>1</sup>Rutgers Cancer Institute, New Brunswick, New Jersey 08901, USA

<sup>2</sup>Department of Molecular Biology and Biochemistry, Rutgers University, Piscataway, New Jersey 08854, USA

<sup>3</sup>Department of Molecular Biology, Princeton University, Princeton, New Jersey 08544, USA

<sup>4</sup>Department of Medicine, Rutgers Robert Wood Johnson Medical School, New Brunswick, New Jersey 08901, USA

<sup>5</sup>Department of Chemistry, Princeton University, Princeton, New Jersey 08544, USA

<sup>6</sup>Ludwig Princeton Branch, Ludwig Institute for Cancer Research, Princeton University, Princeton, New Jersey 08540, USA.

<sup>7</sup>Lewis-Sigler Institute of Integrative Genomics, Princeton University, Princeton, NJ, USA.

<sup>8</sup>Department of Chemical Biology, Rutgers Ernest Mario School of Pharmacy, Piscataway, New Jersey 08854, USA

\* Corresponding Author

#### Corresponding Author:

Jessie Yanxiang Guo, Ph.D.

Rutgers Cancer Institute

RBHS-Robert Wood Johnson Medical School

Rutgers, The State University of New Jersey

195 Little Albany Street

New Brunswick, NJ 08901

[yanxiang@cinj.rutgers.edu](mailto:yanxiang@cinj.rutgers.edu)

Voice: 732-235-9657

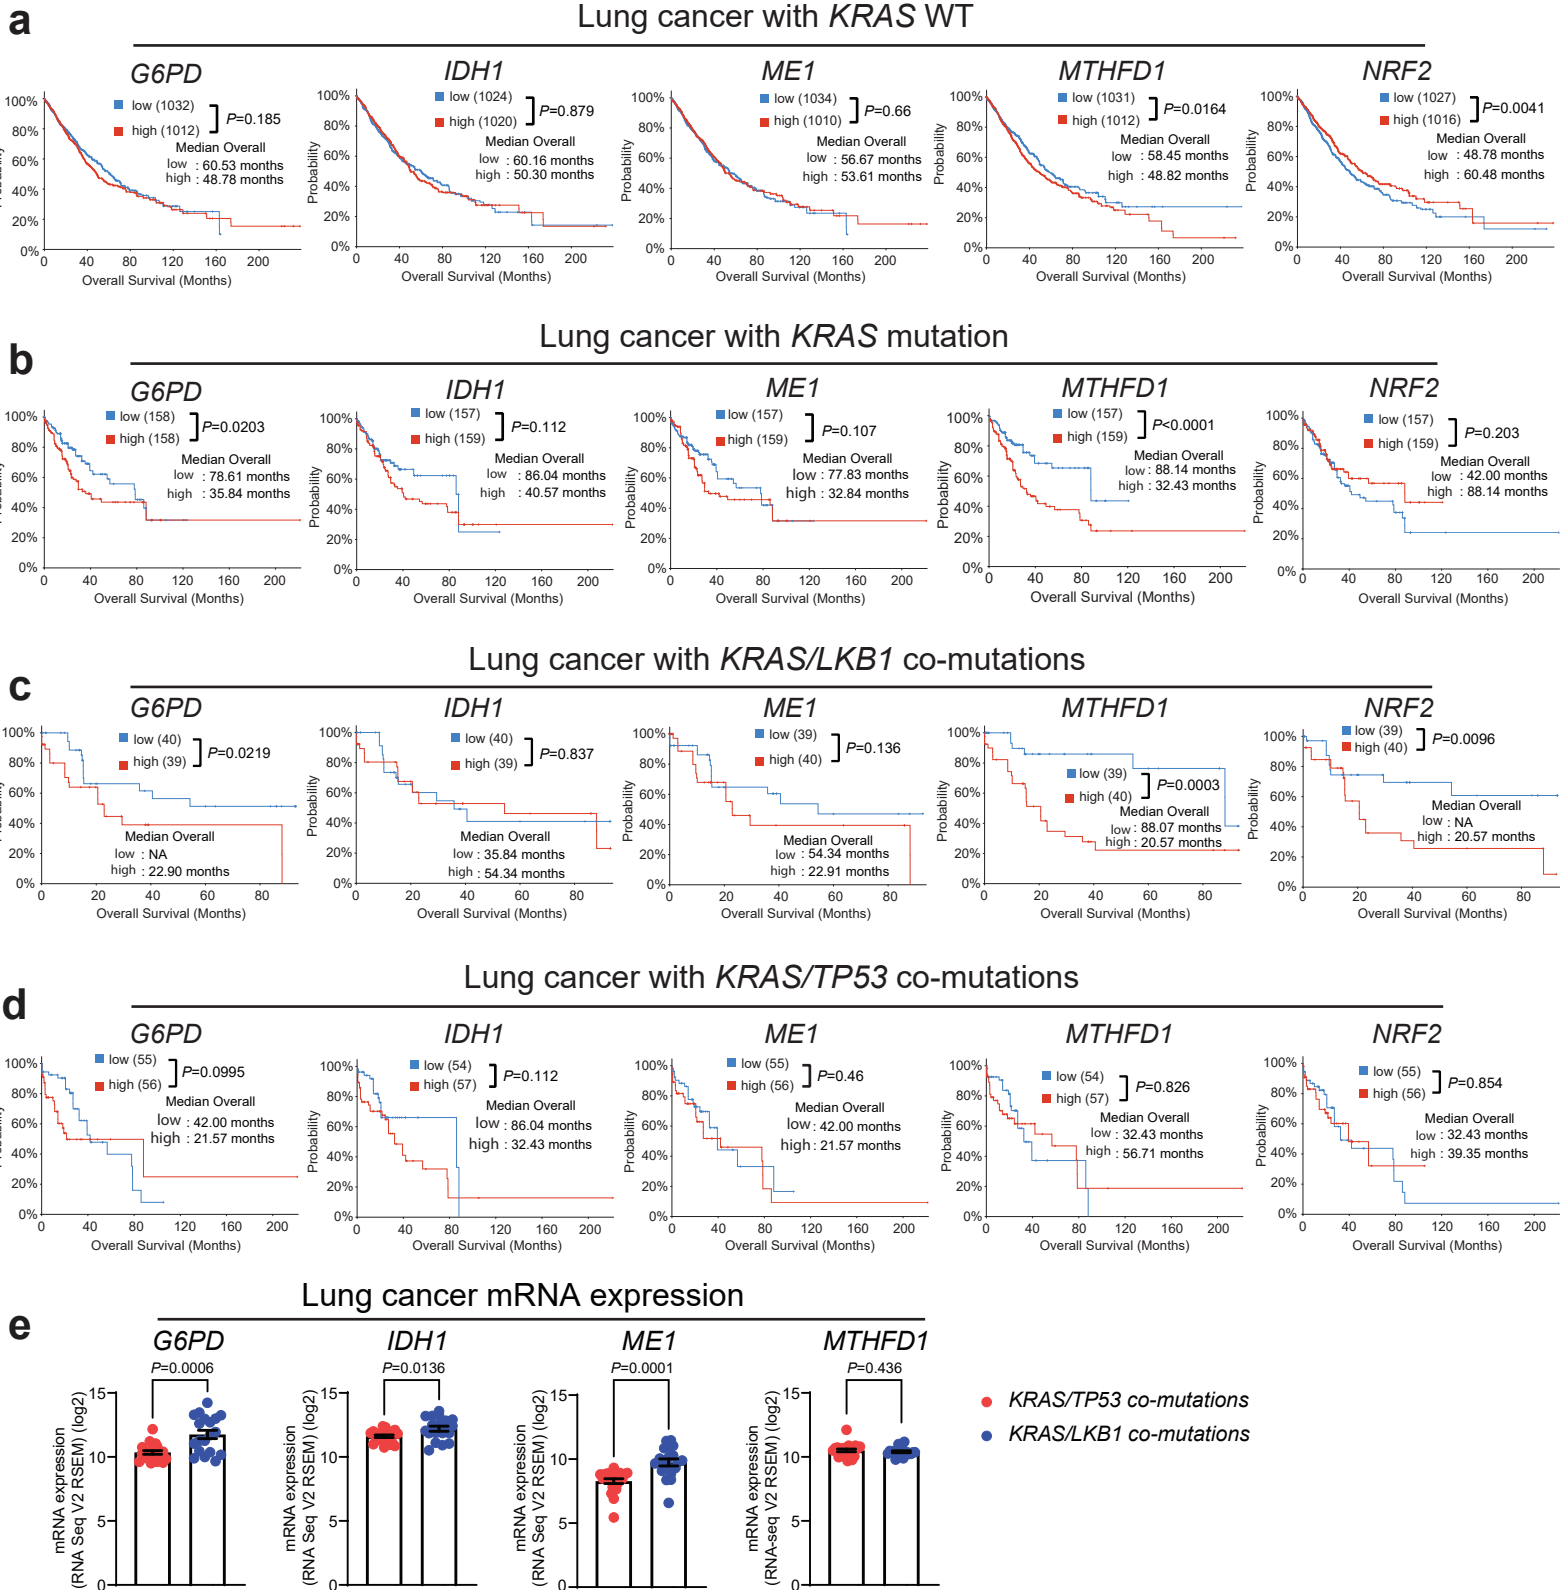

**Supplementary Fig. 1: High *G6PD* expression correlates with poor survival of lung cancer patients with *KRAS/LKB1* co-mutations.**

- a. Overall survival comparison between low and high mRNA expression group of *G6PD*, *IDH1*, *ME1*, *MTHFD1*, and *NRF2* in lung cancer patients with *KRAS* wild type (WT), using data obtained from cBioPortal datasets on December 09, 2023. n = 2044 patients for *G6PD*, *IDH1*, *ME1*, *MTHFD1*, n = 2043 patients for *NRF2*.
- b. Overall survival comparison between low and high mRNA expression group of *G6PD*, *IDH1*, *ME1*, *MTHFD1*, and *NRF2* in lung cancer patients with *KRAS* mutation, using data obtained from cBioPortal datasets on December 09, 2023. n = 316 patients for each gene.
- c. Overall survival comparison between low and high mRNA expression group of *G6PD*, *IDH1*, *ME1*, *MTHFD1*, and *NRF2* in lung cancer patients with *KRAS/LKB1* co-mutations, using data obtained from cBioPortal datasets on December 09, 2023. n = 79 patients for each gene.
- d. Overall survival comparison between low and high mRNA expression group of *G6PD*, *IDH1*, *ME1*, *MTHFD1*, and *NRF2* in lung cancer patients with *KRAS/TP53* co-mutations, using data obtained from cBioPortal datasets on December 09, 2023. n = 111 patients for each gene.
- e. The mRNA expression levels of *G6PD*, *ME1*, *IDH1*, and *MTHFD1* in lung cancer patients with *KRAS/TP53* co-mutations (n = 22 patients) and *KRAS/LKB1* co-mutations (n = 19 patients), using data obtained from cBioPortal datasets on December 09, 2023.

Data are presented as mean  $\pm$  SEM, significance was performed by cBioPortal (version 6.0.1).

Source data are provided as a Source Data file.

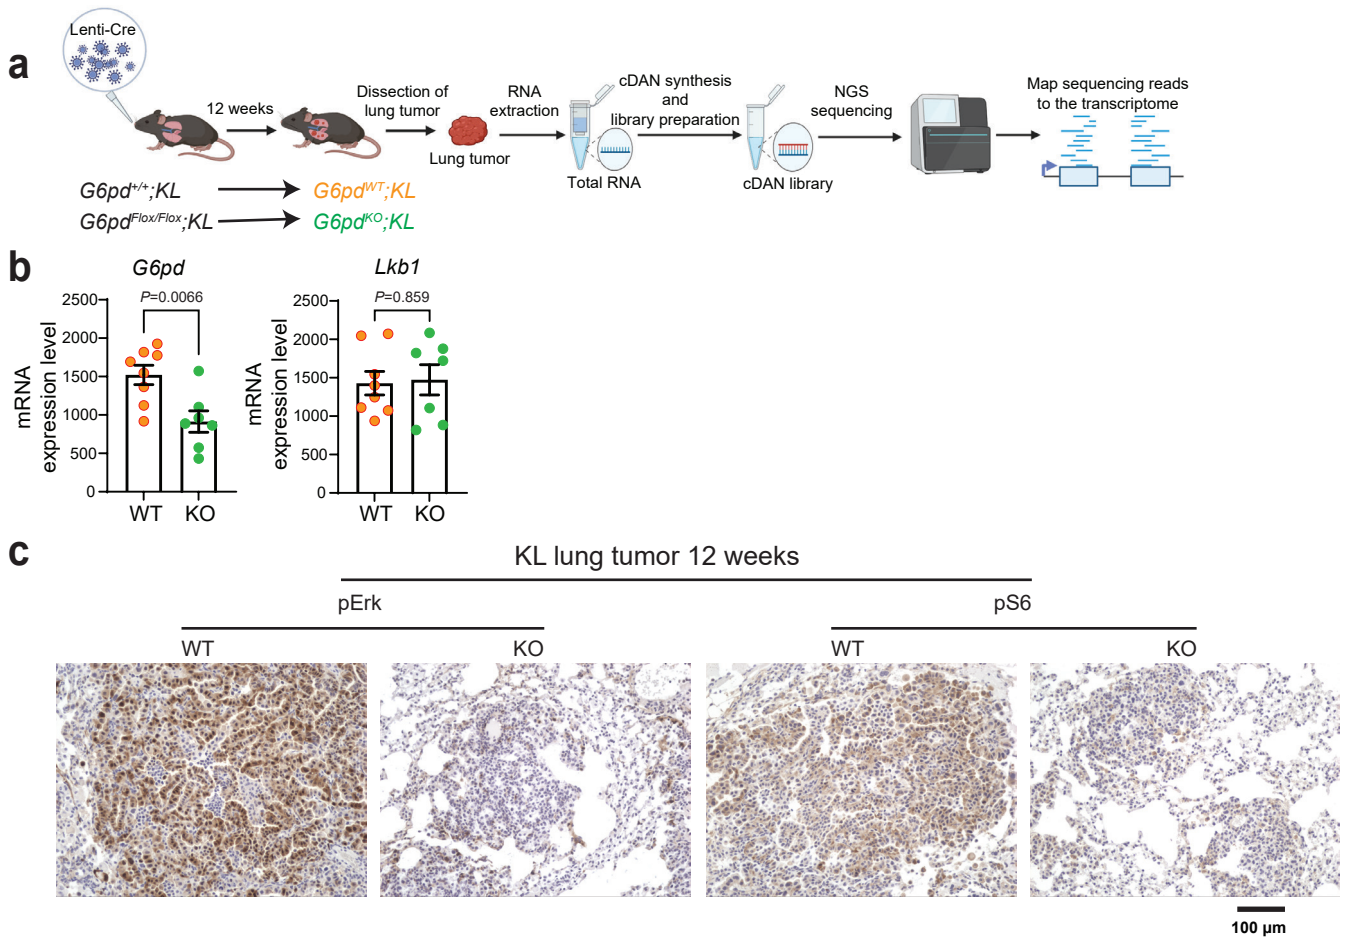

**Supplementary Fig. 2: *G6pd* and *Lkb1* mRNA expression from bulk tumor RNA-seq and IHC staining of pErk and pS6 of KL lung tumors.**

- a. Scheme illustrating the bulk tumor RNA-seq of *G6pd*<sup>WT</sup>;KL and *G6pd*<sup>KO</sup>;KL lung tumors at 12 weeks post-tumor induction (Created with BioRender.com released under a Creative Commons Attribution-NonCommercial-NoDerivs 4.0 International license).
- b. *G6pd* and *Lkb1* mRNA expression of *G6pd*<sup>KO</sup>;KL (n = 7 mice) and *G6pd*<sup>WT</sup>;KL (n = 8 mice) lung tumors.
- c. Lower magnification of IHC staining of pERK (n = 24 images for *G6pd*<sup>WT</sup>;KL, n = 12 images for *G6pd*<sup>KO</sup>;KL) and pS6 (n = 18 images for *G6pd*<sup>WT</sup>;KL, n = 15 images for *G6pd*<sup>KO</sup>;KL) of KL lung tumors at 12 weeks post-tumor induction to show reduced growth signaling of KL lung tumors by G6PD depletion.

Data are presented as mean ± SEM, significance was calculated by two-tailed unpaired *t*-test

(b). Source data are provided as a Source Data file.

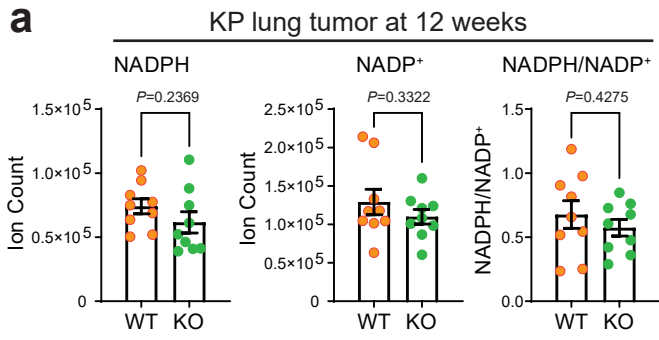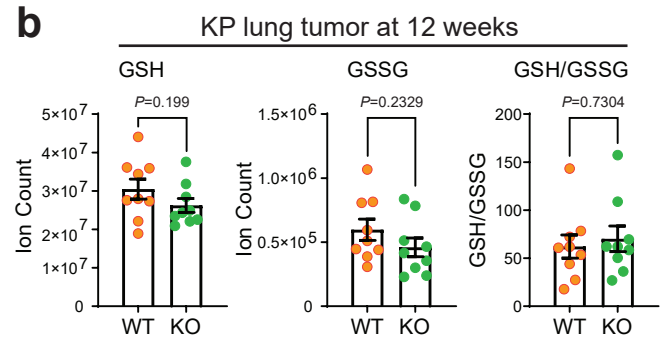

**Supplementary Fig. 3: G6PD loss has no effect on KP lung tumor redox homeostasis.**

- a. Pool size of NADPH and NADP<sup>+</sup>, and NADPH/NADP<sup>+</sup> ratio in *G6pd*<sup>WT</sup>;KP (n = 9 mice) and *G6pd*<sup>KO</sup>;KP (n = 9 mice) lung tumors at 12 weeks post-tumor induction.
- b. Pool size of glutathione (GSH) and glutathione disulfide (GSSG), and GSH/GSSG ratio in *G6pd*<sup>WT</sup>;KP (n = 9 mice) and *G6pd*<sup>KO</sup>;KP (n = 9 mice) lung tumors at 12 weeks post-tumor induction.

Data are presented as mean ± SEM, significance was calculated by two-tailed unpaired *t*-test (a, GSH and GSSG in panel b), or Mann Whitney test (GSH/GSSG in panel b). Source data are provided as a Source Data file.

**a**

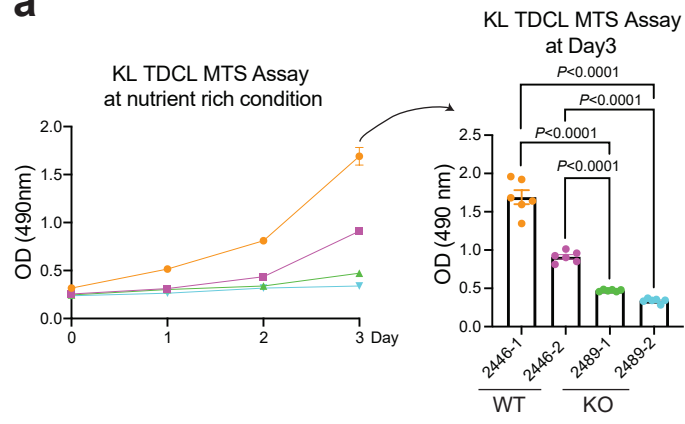

**b**

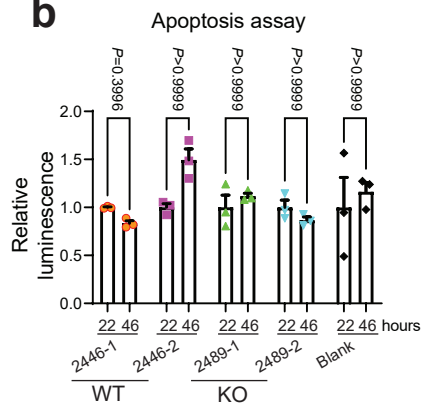

**c**

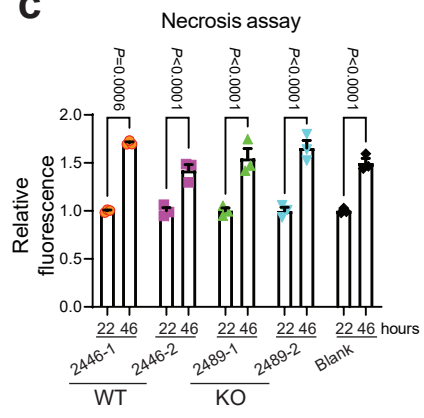



**Supplementary Fig. 4: Reduced  $G6pd^{KO};KL$  TDCLs proliferation is independent of apoptosis and necrosis.**

a. MTS assay of  $G6pd^{WT};KL$  and  $G6pd^{KO};KL$  TDCLs in nutrient rich conditions. n = 6 replicates for each clone at indicated timepoint, except 2489-2 with n = 5 replicates at day 0 and n = 6 replicates at day 1, 2, and 3.

b & c. Apoptosis (b) and necrosis (c) assay of  $G6pd^{WT};KL$  and  $G6pd^{KO};KL$  TDCLs in nutrient rich conditions. n = 3 replicates for each clone at indicated timepoint.

Data are presented as mean  $\pm$  SEM, significance was calculated by one-way ANOVA followed by Bonferroni's multiple comparisons test (a, b, c). Source data are provided as a Source Data file.

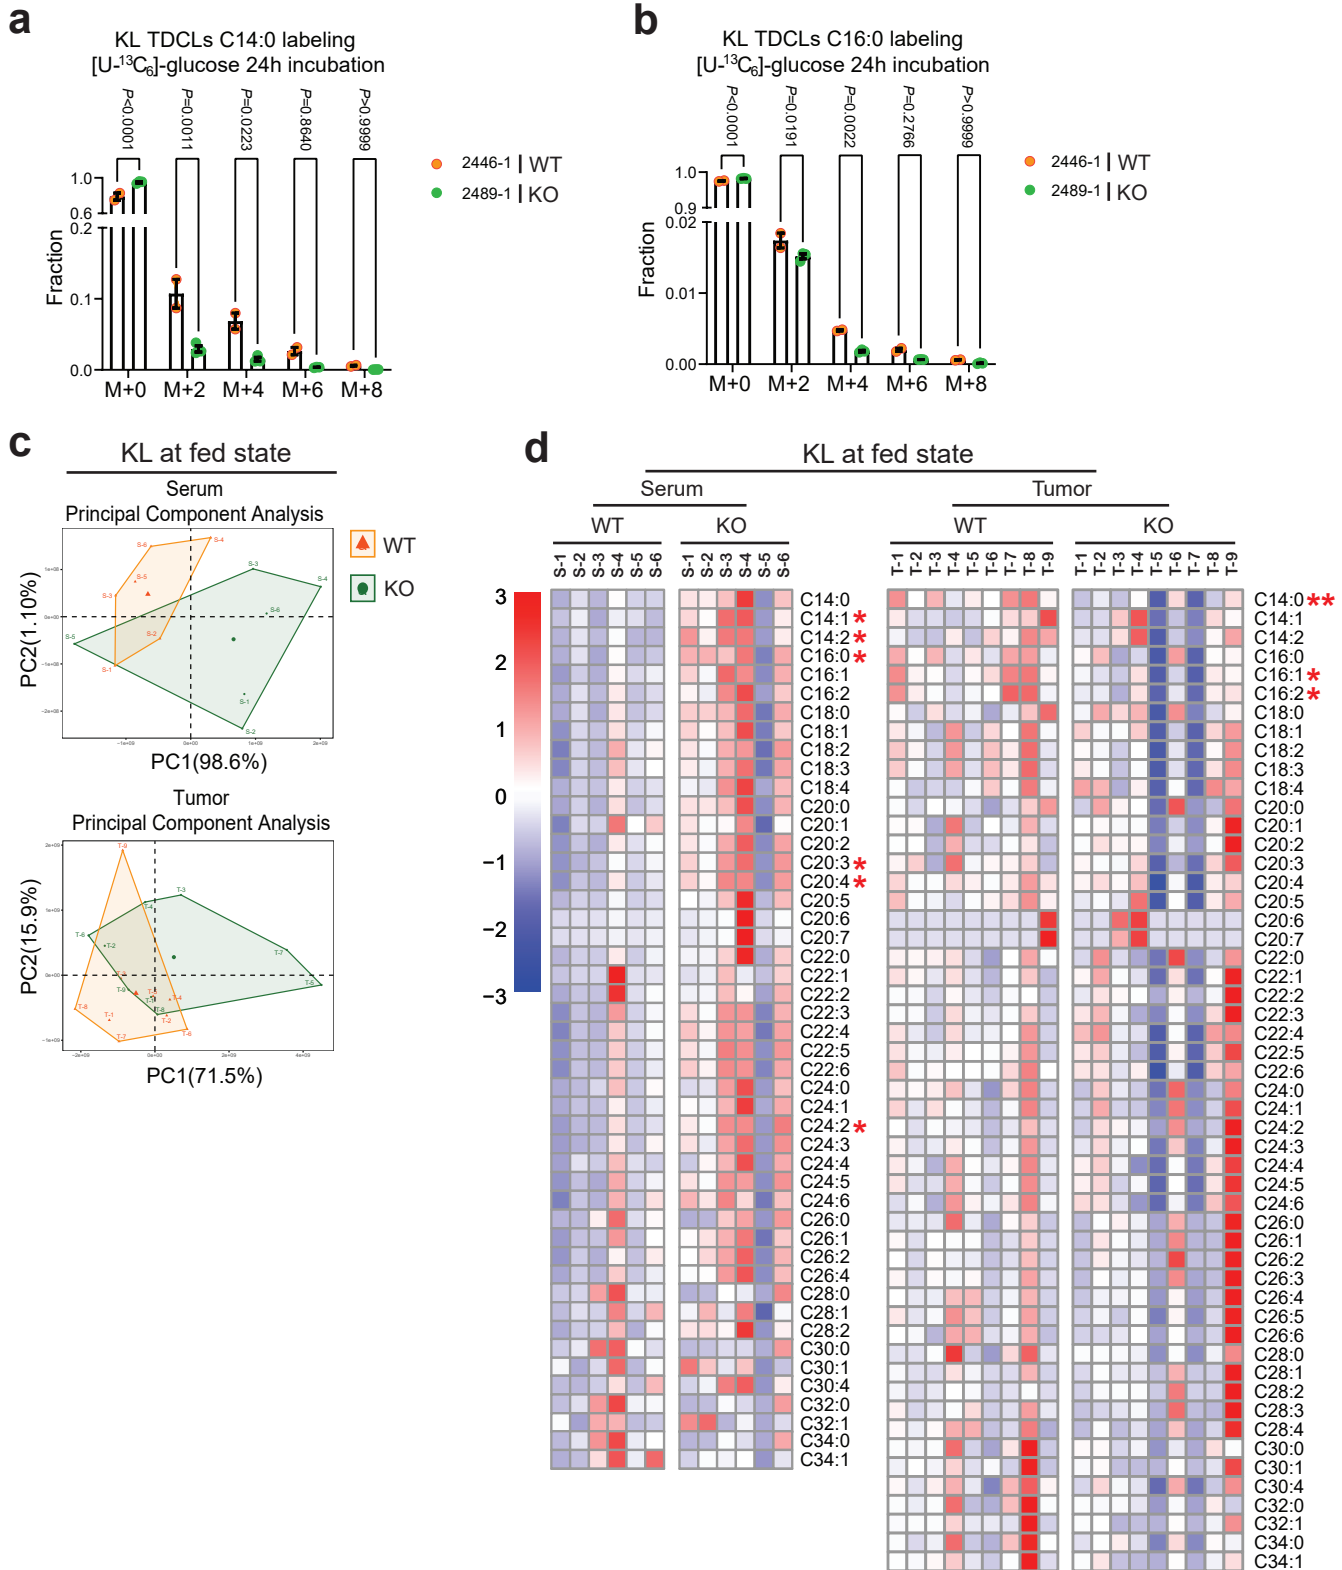

**Supplementary Fig. 5: G6PD deficiency affects KL lung tumor lipid metabolism.**

a & b. C14:0 (a) and C16:0 (b)  $^2\text{H}$  labeling fraction of  $G6pd^{WT};KL$  and  $G6pd^{KO};KL$  TDCLs after 24 hours [ $\text{U-}^{13}\text{C}_6$ ]-glucose labeling.  $n = 2$  replicates for  $G6pd^{WT};KL$  TDCL,  $n = 3$  replicates for  $G6pd^{KO};KL$  TDCL.

c & d. Principal Component Analysis (PCA) (c) and Heatmap (d) of saponified fatty acid pool size of  $G6pd^{WT};KL$  and  $G6pd^{KO};KL$  lung tumors and serum from KL tumor bearing mice in fed state (food was kept in cages, and mice were euthanized with samples collected at 8:00AM) at 12 weeks post-tumor induction.  $n = 6$  mice for tumor and serum samples.

Data are presented as mean  $\pm$  SEM, significance was calculated by two-tailed unpaired  $t$ -test (c, d) or two-way ANOVA followed by Bonferroni's multiple comparisons test (a, b).  $*P < 0.05$ ;  $**P < 0.01$ . Source data are provided as a Source Data file.



**Supplementary Fig. 6: G6PD deficiency does not impact KP lung tumor lipid metabolism.**

a & b. Principal Component Analysis (PCA) (a) and Heatmap (b) of saponified fatty acid pool size of *G6pd*<sup>WT</sup>;*KP* and *G6pd*<sup>KO</sup>;*KP* lung tumors and serum from KP lung tumor bearing mice in fasted state (food was removed from the mice at approximately 9:00AM, and mice were euthanized with samples collected at 3:00PM) at 12 weeks post-tumor induction. n = 6 mice for tumor and serum samples.

c & d. Principal Component Analysis (PCA) (c) and Heatmap (d) of saponified fatty acid pool size of *G6pd*<sup>WT</sup>;*KP* and *G6pd*<sup>KO</sup>;*KP* lung tumors and serum from KP lung tumor bearing mice in fed state (food was kept in cages, and mice were euthanized with samples collected at 8:00AM) at 12 weeks post-tumor induction. n = 6 mice for tumor and serum samples.

Data are presented as mean ± SEM, significance was calculated by two-tailed unpaired *t*-test (a, b, c, d). \**P* < 0.05; \*\**P* < 0.01. Source data are provided as a Source Data file.

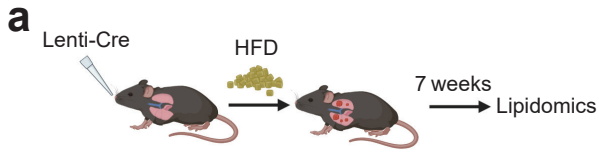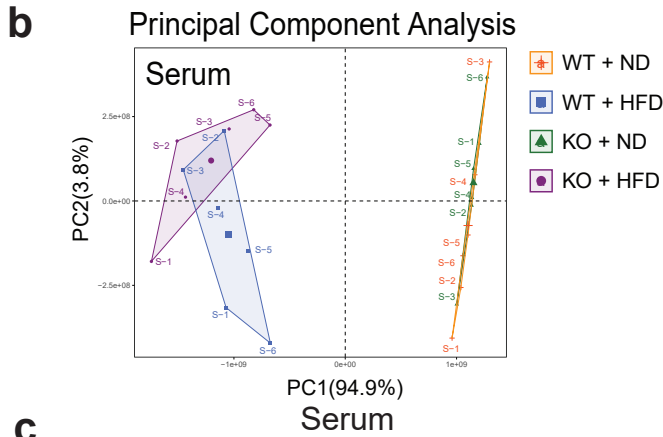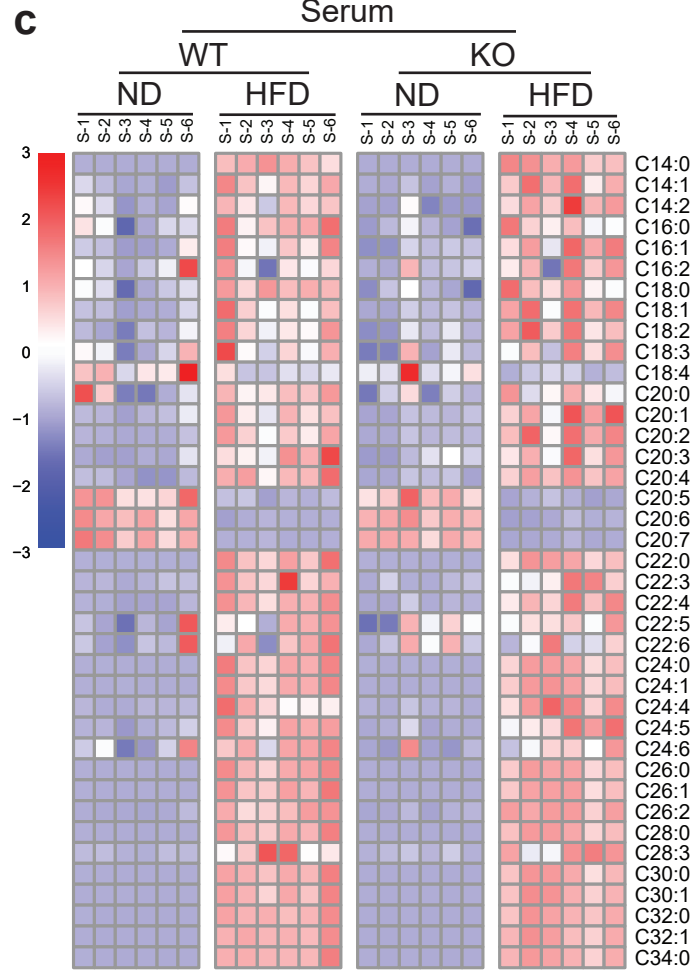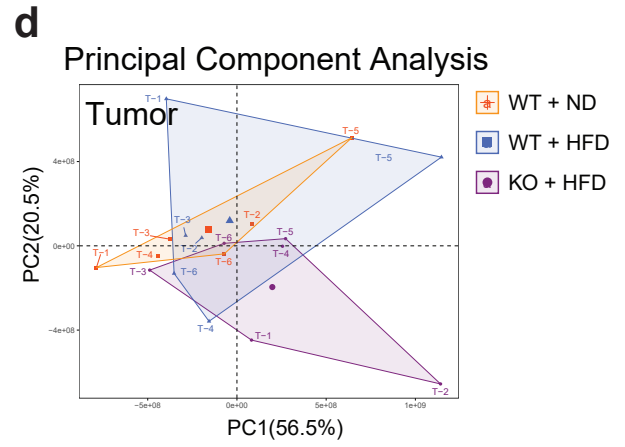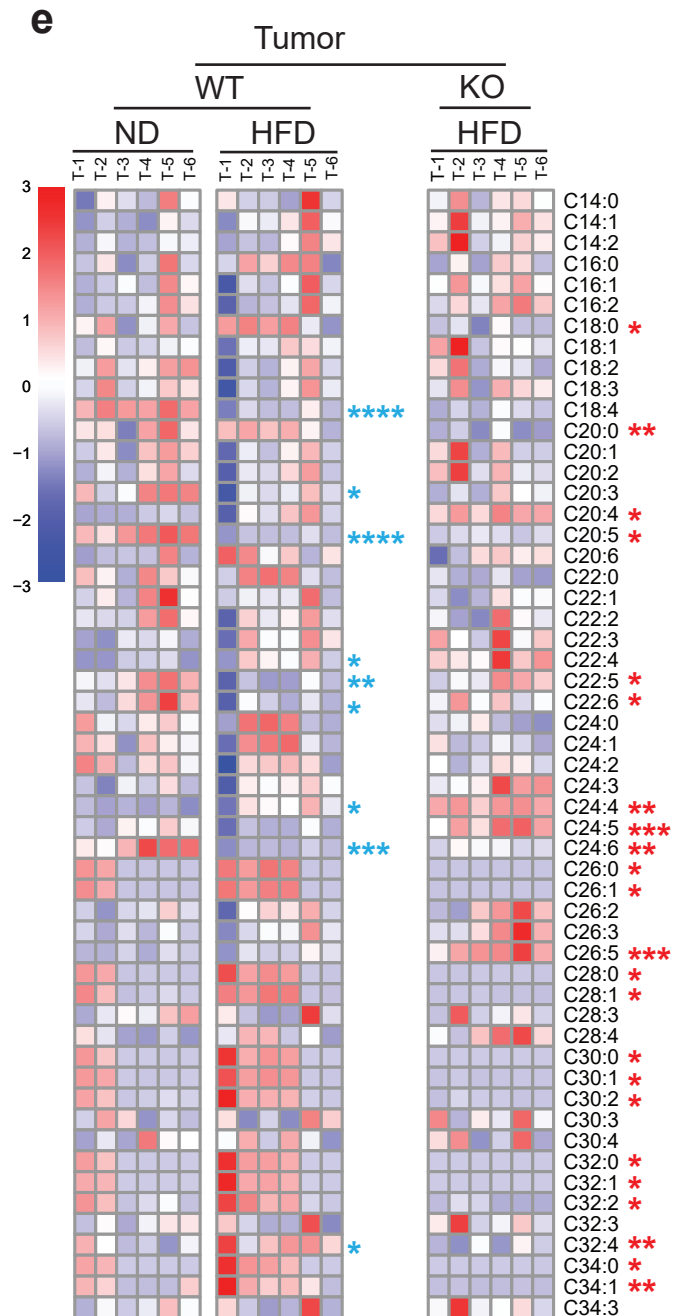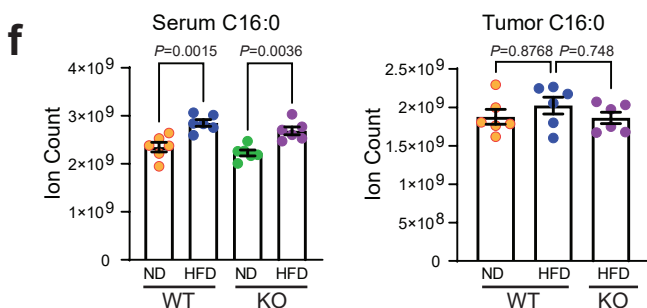

**Supplementary Fig. 7: HFD partially rescues the alterations in fatty acyl group composition resulting from G6PD loss.**

a. Scheme to examine the effect of HFD on fatty acyl group composition of KL lung tumors (Created with BioRender.com released under a Creative Commons Attribution-NonCommercial-NoDerivs 4.0 International license).

b & c. PCA (a) and heatmap (b) of saponified fatty acid pool size of serum from  $G6pd^{WT};KL$  or  $G6pd^{KO};KL$  lung tumor bearing mice fed with normal diet (ND, for 7 weeks) or high fat diet (HFD, for 7 weeks) in fasted state (food was removed from the mice at approximately 9:00AM, and mice were euthanized with samples collected at 3:00PM) at 7 weeks post-tumor induction. n = 6 mice for each group.

d & e. PCA (c) and heatmap (d) of saponified fatty acid pool size of  $G6pd^{WT};KL$  or  $G6pd^{KO};KL$  lung tumors from tumor bearing mice fed with normal diet (ND, for 7 weeks) or high fat diet (HFD, for 7 weeks) in fasted state (food was removed from the mice at approximately 9:00AM, and mice were euthanized with samples collected at 3:00PM) at 7 weeks post-tumor induction. n = 6 mice for each group. Blue asterisks denote significance between ND and HFD in  $G6pd^{WT};KL$  tumors, while red asterisks denote significance between  $G6pd^{WT};KL$  and  $G6pd^{KO};KL$  tumors in HFD.

f. Pool size of C16:0 of  $G6pd^{WT};KL$  and  $G6pd^{KO};KL$  tumors and serum from (b) and (d).

Data are presented as mean  $\pm$  SEM, significance was calculated by two-tailed unpaired *t*-test (d) one-way ANOVA followed by Bonferroni's multiple comparisons test (e). \**P* < 0.05; \*\**P* < 0.01; \*\*\**P* < 0.001; \*\*\*\**P* < 0.0001. Source data are provided as a Source Data file.

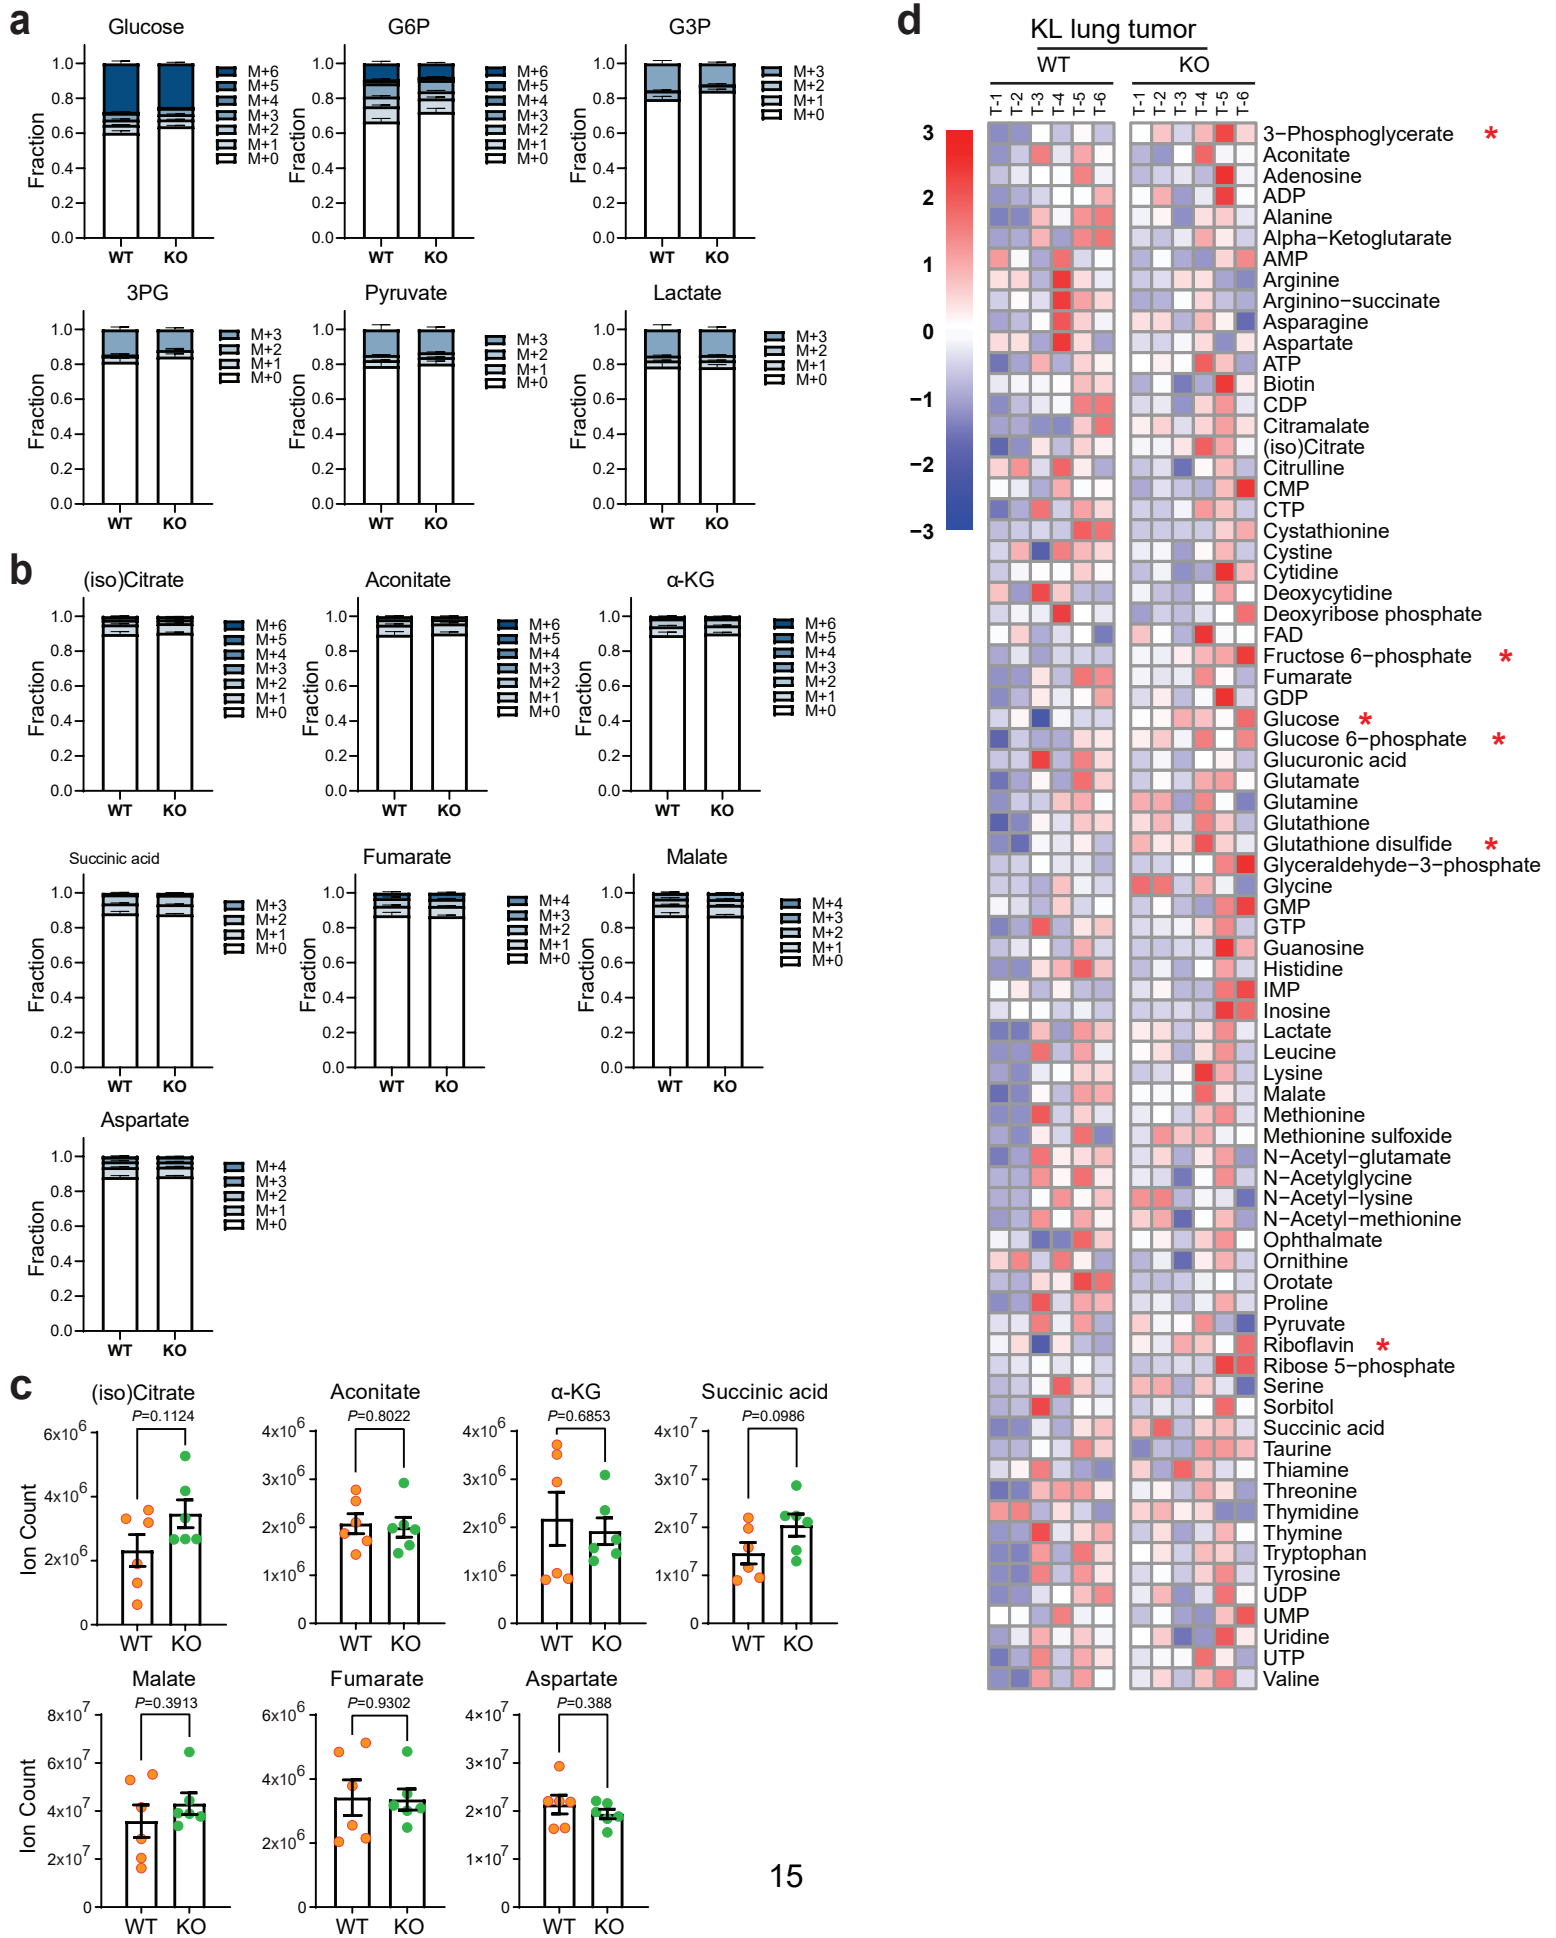



**Supplementary Fig. 8: G6PD loss does not affect KL lung tumor TCA cycle metabolism.**

- a.  $^{13}\text{C}$  labeling fraction of glycolytic intermediates from glucose of *G6pd*<sup>WT</sup>;KL (n = 6 mice) and *G6pd*<sup>KO</sup>;KL (n = 6 mice) lung tumors in fasted state (food was removed from the mice at approximately 9:00AM, and mice were euthanized with samples collected at 3:00PM) at 12 weeks post-tumor induction. Glucose 6-phosphate (G6P), glyceraldehyde 3-phosphate (G3P), 3-phosphoglycerate (3-PG),
- b.  $^{13}\text{C}$  labeling fraction of TCA cycle intermediates from glucose of tumors same with (a).  $\alpha$ -ketoglutarate ( $\alpha$ -KG).
- c. Pool size of TCA cycle intermediates of tumors same with (a).
- d. A heatmap of water-soluble metabolites of tumors same with (a).

Data are presented as mean  $\pm$  SEM, significance was calculated by two-tailed unpaired *t*-test (c). \**P* < 0.05. Source data are provided as a Source Data file.

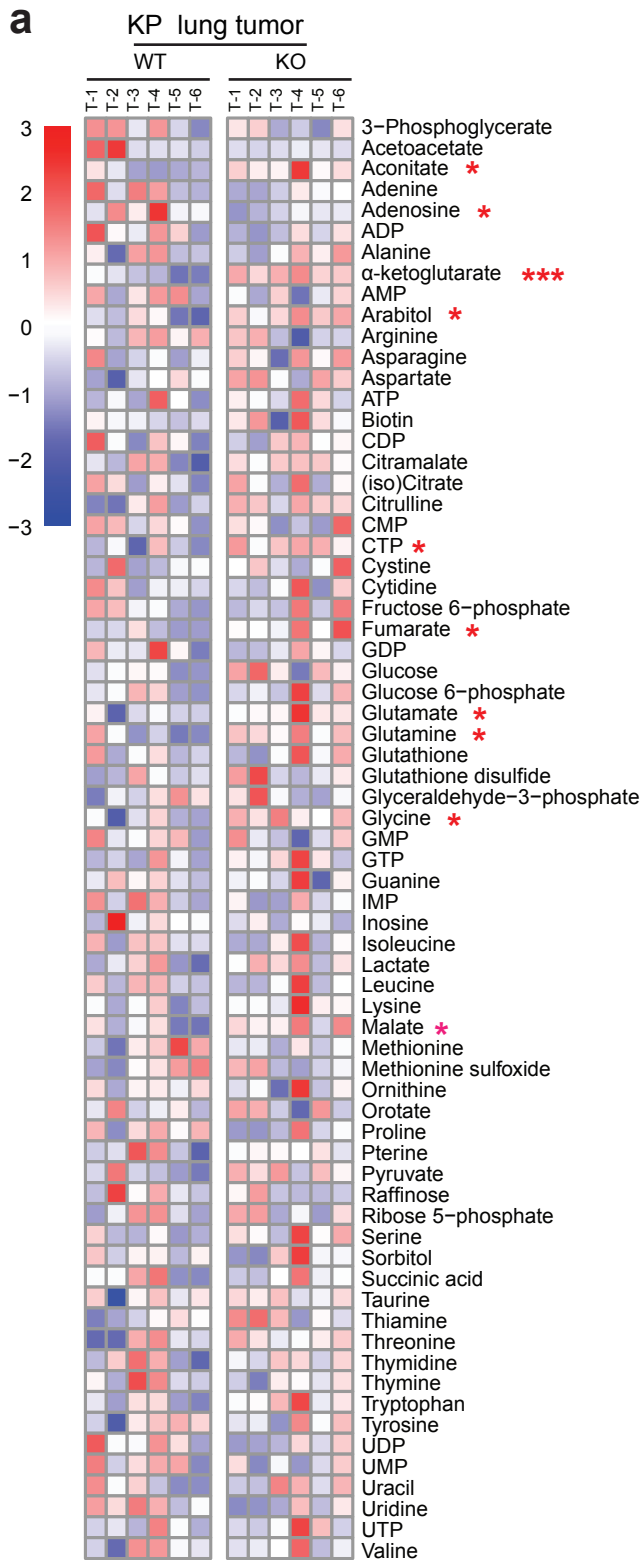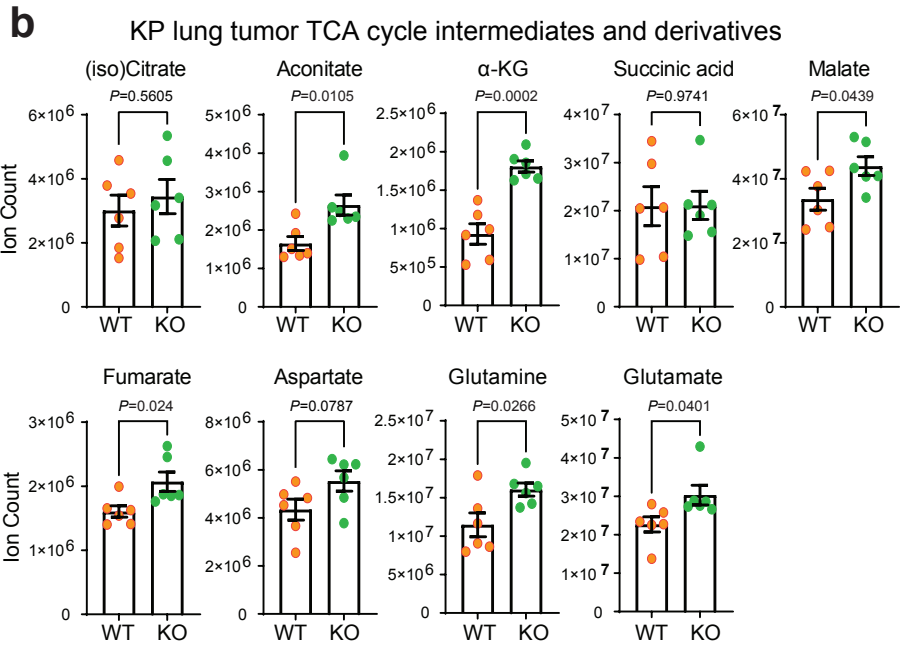

**Supplementary Fig. 9: G6PD loss increases the pool size levels of TCA cycle intermediates in KP lung tumors.**

- a. Heatmap of water-soluble metabolites of *G6pd*<sup>WT</sup>;*KP* (n = 6 mice) and *G6pd*<sup>KO</sup>;*KP* (n = 6 mice) lung tumors in fasted state (food was removed from the mice at approximately 9:00AM, and mice were euthanized with samples collected at 3:00PM) at 12 weeks post-tumor induction.
- b. Pool size of TCA cycle intermediates and derivatives of *G6pd*<sup>WT</sup>;*KP* and *G6pd*<sup>KO</sup>;*KP* tumors from (a).  $\alpha$ -ketoglutarate ( $\alpha$ -KG).

Data are presented as mean  $\pm$  SEM, significance was calculated by two-tailed unpaired *t*-test (a, b). \**P* < 0.05; \*\*\**P* < 0.001. Source data are provided as a Source Data file.

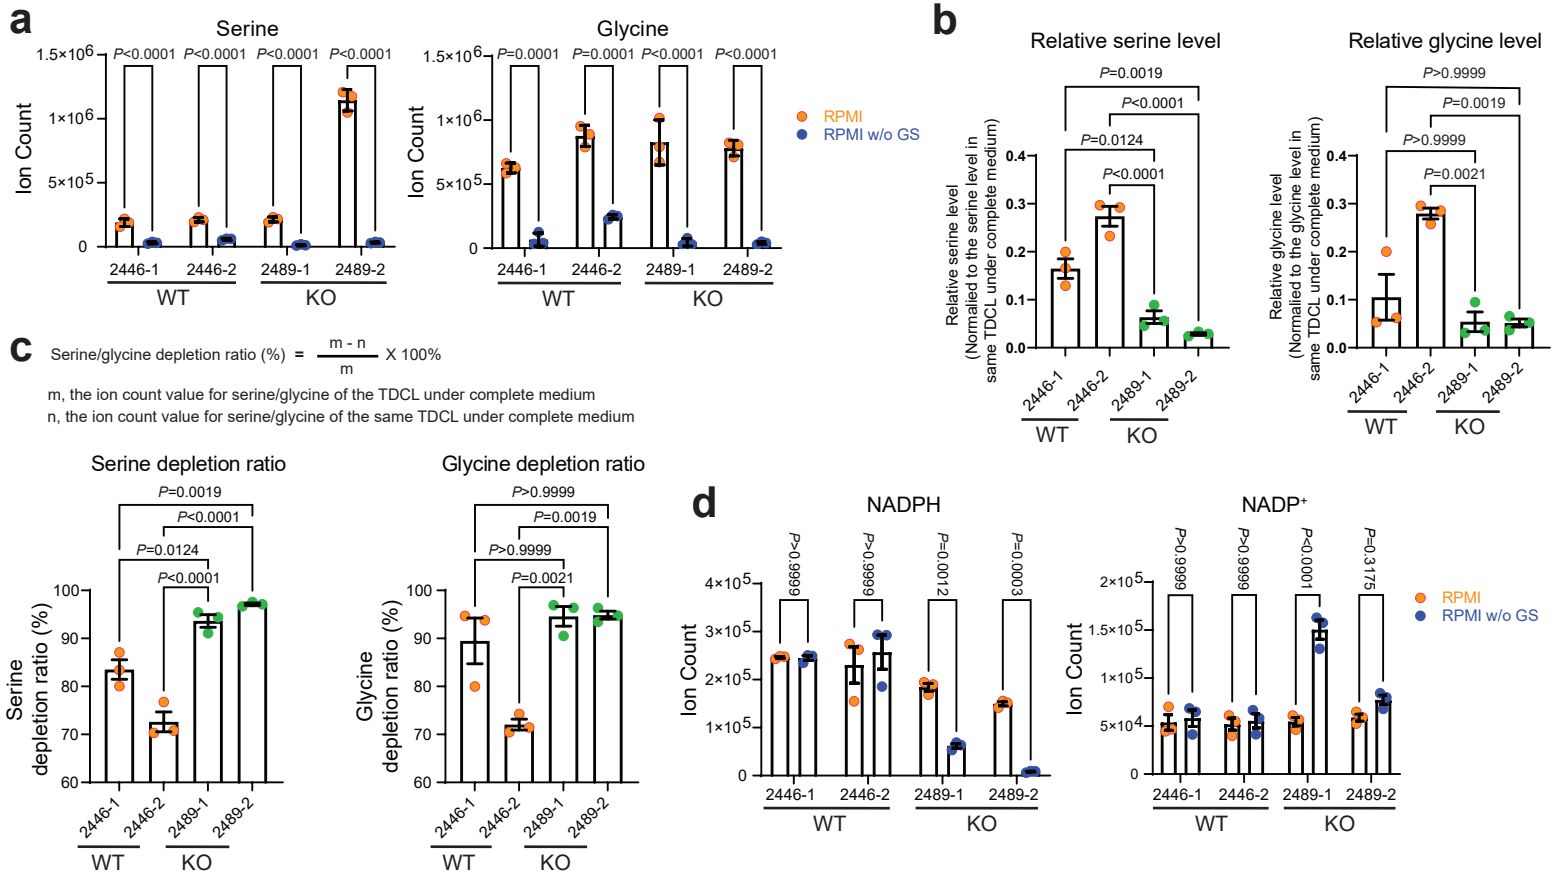

**Supplementary Fig. 10: Serine/glycine depletion in KL TDCLs.**

- a. Pool size of intracellular serine and glycine of *G6pd<sup>WT</sup>;KL* and *G6pd<sup>KO</sup>;KL* TDCLs after 24 hours cultured in RPMI medium with or without serine and glycine. RPMI denotes cells cultured in complete RPMI medium, RPMI w/o GS denotes cells cultured in complete RPMI medium without serine and glycine. n = 3 replicates for each clone under different conditions.
- b. Relative intracellular serine and glycine pool size levels of *G6pd<sup>WT</sup>;KL* and *G6pd<sup>KO</sup>;KL* TDCLs after 24 hours cultured in RPMI medium without serine and glycine. RPMI denotes cells cultured in complete RPMI medium, RPMI w/o GS denotes cells cultured in complete RPMI medium without serine and glycine. n = 3 replicates for each clone under different conditions.
- c. Intracellular serine and glycine depletion ratio of *G6pd<sup>WT</sup>;KL* and *G6pd<sup>KO</sup>;KL* TDCLs after 24 hours cultured in RPMI medium without serine/glycine depleted medium. RPMI denotes cells cultured in complete RPMI medium, RPMI w/o GS denotes cells cultured in complete RPMI medium without serine and glycine. n = 3 replicates for each clone under different conditions.
- d. Pool size levels of NADPH and NADP+ of *G6pd<sup>WT</sup>;KL* and *G6pd<sup>KO</sup>;KL* TDCLs after 24 hours cultured in RPMI medium with or without serine and glycine. RPMI denotes cells cultured in complete RPMI medium, RPMI w/o GS denotes cells cultured in complete RPMI medium without serine and glycine. n = 3 replicates for each clone under different conditions.

Data are presented as mean  $\pm$  SEM, significance was calculated by two-way ANOVA followed by Bonferroni's multiple comparisons test (a, b, c, d, e). Source data are provided as a Source Data file.

**Supplementary Table 1: List of the 28 studies involved in the overall survival analysis for lung cancer patients in the cBioPortal datasets**

| <b>NO.</b> | <b>Study</b>                                                       |
|------------|--------------------------------------------------------------------|
| 1          | Lung Adenocarcinoma (Broad, Cell 2012)                             |
| 2          | Lung Adenocarcinoma (CPTAC, Cell 2020)                             |
| 3          | Lung Adenocarcinoma (MSK Mind, Nature Cancer 2022)                 |
| 4          | Lung Adenocarcinoma (MSK, 2021)                                    |
| 5          | Lung Adenocarcinoma (MSK, J Thorac Oncol 2020)                     |
| 6          | Lung Adenocarcinoma (MSK, NPJ Precision Oncology 2021)             |
| 7          | Lung Adenocarcinoma (MSK, Science 2015)                            |
| 8          | Lung Adenocarcinoma (OncoSG, Nat Genet 2020)                       |
| 9          | Lung Adenocarcinoma (TCGA, Firehose Legacy)                        |
| 10         | Lung Adenocarcinoma (TCGA, Nature 2014)                            |
| 11         | Lung Adenocarcinoma (TCGA, PanCancer Atlas)                        |
| 12         | Lung Adenocarcinoma (TSP, Nature 2008)                             |
| 13         | Lung Adenocarcinoma Met Organotropism (MSK, Cancer cell 2023)      |
| 14         | Lung Cancer (SMC, Cancer Research 2016)                            |
| 15         | Lung Cancer in Never Smokers (NCI, Nature Genetics 2021)           |
| 16         | Lung Squamous Cell Carcinoma (CPTAC, Cell 2021)                    |
| 17         | Lung Squamous Cell Carcinoma (TCGA, Firehose Legacy)               |
| 18         | Lung Squamous Cell Carcinoma (TCGA, Nature 2012)                   |
| 19         | Lung Squamous Cell Carcinoma (TCGA, PanCancer Atlas)               |
| 20         | Metastatic Non-Small Cell Lung Cancer (MSK, Nature Medicine 2022)  |
| 21         | Non-Small Cell Cancer (MSK, Cancer Discov 2017)                    |
| 22         | Non-Small Cell Lung Cancer (MSK, Cancer Cell 2018)                 |
| 23         | Non-Small Cell Lung Cancer (MSK, J Clin Oncol 2018)                |
| 24         | Non-Small Cell Lung Cancer (MSK, Science 2015)                     |
| 25         | Non-Small Cell Lung Cancer (TRACERx, NEJM & Nature 2017)           |
| 26         | Non-Small Cell Lung Cancer (University of Turin, Lung Cancer 2017) |
| 27         | Non-Small Cell Lung Cancer Brain Metastasis (MSK, Nat Commun 2023) |
| 28         | Pan-Lung Cancer (TCGA, Nat Genet 2016)                             |

**Supplementary Table 2: Sequences of mouse genotyping primers used in this study**

---

|                |                           |
|----------------|---------------------------|
| <i>Kras</i> _F | CCATGGCTTGAGTAAGTCTGC     |
| <i>Kras</i> _R | CGCAGACTGTAGAGCAGCG       |
| <i>G6pd</i> _F | TCCTGAGTACTGGAATCACAACCTG |
| <i>G6pd</i> _R | CACAGAACAGATGCTCATTGTGAG  |
| <i>Lkb1</i> _F | ATCGGAATGTGATCCAGCTT      |
| <i>Lkb1</i> _R | ACGTAGGCTGTGCAACCTCT      |
| <i>P53</i> _F  | GGTTAAACCCAGCTTGACCA      |
| <i>P53</i> _R  | GGAGGCAGAGACAGTTGGAG      |

---
